# Supplementary material
Source: publisher figshare collection journal article supplement (https://acs.figshare.com/ndownloader/files/4393018)
Supplement: Supplementary file 1 [file 4393018]

 
data_091211_l_h_140_small 
 
_audit_creation_method            SHELXL-97 
_chemical_name_systematic 
; 
 ? 
; 
_chemical_name_common             ? 
_chemical_melting_point           ? 
_chemical_formula_moiety          'C44 H30'  
_chemical_formula_sum 
 'C44 H30' 
_chemical_formula_weight          558.68 
 
loop_ 
 _atom_type_symbol 
 _atom_type_description 
 _atom_type_scat_dispersion_real 
 _atom_type_scat_dispersion_imag 
 _atom_type_scat_source 
 'C'  'C'   0.0181   0.0091 
 'International Tables Vol C Tables 4.2.6.8 and 6.1.1.4' 
 'H'  'H'   0.0000   0.0000 
 'International Tables Vol C Tables 4.2.6.8 and 6.1.1.4' 
 
_symmetry_cell_setting            'Trigonal ' 
_symmetry_space_group_name_H-M    'R -3' 
_symmetry_space_group_name_Hall   '-R 3'
 
loop_ 
 _symmetry_equiv_pos_as_xyz 
 'x, y, z' 
 '-y, x-y, z' 
 '-x+y, -x, z' 
 'x+2/3, y+1/3, z+1/3' 
 '-y+2/3, x-y+1/3, z+1/3' 
 '-x+y+2/3, -x+1/3, z+1/3' 
 'x+1/3, y+2/3, z+2/3' 
 '-y+1/3, x-y+2/3, z+2/3' 
 '-x+y+1/3, -x+2/3, z+2/3' 
 '-x, -y, -z' 
 'y, -x+y, -z' 
 'x-y, x, -z' 
 '-x+2/3, -y+1/3, -z+1/3' 
 'y+2/3, -x+y+1/3, -z+1/3' 
 'x-y+2/3, x+1/3, -z+1/3' 
 '-x+1/3, -y+2/3, -z+2/3' 
 'y+1/3, -x+y+2/3, -z+2/3' 
 'x-y+1/3, x+2/3, -z+2/3' 
 
_cell_length_a                    39.1553(7) 
_cell_length_b                    39.1553(7) 
_cell_length_c                    11.16743(18) 
_cell_angle_alpha                 90.00 
_cell_angle_beta                  90.00 
_cell_angle_gamma                 120.00 
_cell_volume                      14827.4(5) 
_cell_formula_units_Z             18 
_cell_measurement_temperature     293(2) 
_cell_measurement_reflns_used     10919 
_cell_measurement_theta_min       3.9001 
_cell_measurement_theta_max       66.8414 
 
_exptl_crystal_description        block 
_exptl_crystal_colour             red
_exptl_crystal_size_max           0.30 
_exptl_crystal_size_mid           0.26 
_exptl_crystal_size_min           0.20 
_exptl_crystal_density_meas       ? 
_exptl_crystal_density_diffrn     1.126 
_exptl_crystal_density_method     'not measured' 
_exptl_crystal_F_000              5292 
_exptl_absorpt_coefficient_mu     0.483 
_exptl_absorpt_correction_type    'multi-scan' 
_exptl_absorpt_correction_T_min   0.86 
_exptl_absorpt_correction_T_max   0.91
_exptl_absorpt_process_details    
;
CrysAlisPro, Oxford Diffraction Ltd.,
Version 1.171.33.53 (release 17-11-2009 CrysAlis171 .NET)
(compiled Nov 17 2009,16:58:22)
Empirical absorption correction using spherical harmonics,
 implemented in SCALE3 ABSPACK scaling algorithm.
;
 
_exptl_special_details 
; 
 ? 
; 
 
_diffrn_ambient_temperature       293(2) 
_diffrn_radiation_wavelength      1.54184 
_diffrn_radiation_type            CuK\a 
_diffrn_radiation_source          'fine-focus sealed tube' 
_diffrn_radiation_monochromator   graphite 
_diffrn_measurement_device_type   'Xcalibur, Atlas, Gemini ultra' 
_diffrn_measurement_method        '\w scans' 
_diffrn_detector_area_resol_mean  10.3592 
_diffrn_standards_number          ? 
_diffrn_standards_interval_count  ? 
_diffrn_standards_interval_time   ? 
_diffrn_standards_decay_%         ? 
_diffrn_reflns_number             20759 
_diffrn_reflns_av_R_equivalents   0.0256 
_diffrn_reflns_av_sigmaI/netI     0.0189 
_diffrn_reflns_limit_h_min        -45 
_diffrn_reflns_limit_h_max        46 
_diffrn_reflns_limit_k_min        -46 
_diffrn_reflns_limit_k_max        46 
_diffrn_reflns_limit_l_min        -9 
_diffrn_reflns_limit_l_max        12 
_diffrn_reflns_theta_min          3.91 
_diffrn_reflns_theta_max          66.89 
_reflns_number_total              5799 
_reflns_number_gt                 4855 
_reflns_threshold_expression      >2sigma(I) 
 
_computing_cell_refinement        
;
CrysAlisPro, Oxford Diffraction Ltd.,
Version 1.171.33.52 (release 06-11-2009 CrysAlis171 .NET)
(compiled Nov  6 2009,16:24:50)
;
_computing_data_collection        
;
CrysAlisPro, Oxford Diffraction Ltd.,
Version 1.171.33.52 (release 06-11-2009 CrysAlis171 .NET)
(compiled Nov  6 2009,16:24:50)
;
_computing_data_reduction         
;
CrysAlisPro, Oxford Diffraction Ltd.,
Version 1.171.33.52 (release 06-11-2009 CrysAlis171 .NET)
(compiled Nov  6 2009,16:24:50)
;
_computing_molecular_graphics     
;
 OLEX2: a complete structure solution, refinement and analysis program.
 Dolomanov et al., J. Appl. Cryst. (2009). 42, 339-341
;
_computing_publication_material   
;
 OLEX2: a complete structure solution, refinement and analysis program.
 Dolomanov et al., J. Appl. Cryst. (2009). 42, 339-341
;
 
_refine_special_details 
; 
 Refinement of F^2^ against ALL reflections.  The weighted R-factor wR and 
 goodness of fit S are based on F^2^, conventional R-factors R are based 
 on F, with F set to zero for negative F^2^. The threshold expression of 
 F^2^ > 2sigma(F^2^) is used only for calculating R-factors(gt) etc. and is 
 not relevant to the choice of reflections for refinement.  R-factors based 
 on F^2^ are statistically about twice as large as those based on F, and R- 
 factors based on ALL data will be even larger. 
; 
 
_refine_ls_structure_factor_coef  Fsqd  
_refine_ls_matrix_type            full 
_refine_ls_weighting_scheme       calc  
_refine_ls_weighting_details 
 'calc w=1/[\s^2^(Fo^2^)+(0.1227P)^2^+0.5886P] where P=(Fo^2^+2Fc^2^)/3' 
_atom_sites_solution_primary      direct 
_atom_sites_solution_secondary    difmap 
_atom_sites_solution_hydrogens    geom 
_refine_ls_hydrogen_treatment     constr
_refine_ls_extinction_method      SHELXL 
_refine_ls_extinction_coef        0.00021(3) 
_refine_ls_extinction_expression 
 'Fc^*^=kFc[1+0.001xFc^2^\l^3^/sin(2\q)]^-1/4^' 
_refine_ls_number_reflns          5799 
_refine_ls_number_parameters      398 
_refine_ls_number_restraints      0 
_refine_ls_R_factor_all           0.0602 
_refine_ls_R_factor_gt            0.0532 
_refine_ls_wR_factor_ref          0.1724 
_refine_ls_wR_factor_gt           0.1655 
_refine_ls_goodness_of_fit_ref    1.147 
_refine_ls_restrained_S_all       1.147 
_refine_ls_shift/su_max           0.001 
_refine_ls_shift/su_mean          0.000 
 
loop_ 
 _atom_site_label 
 _atom_site_type_symbol 
 _atom_site_fract_x 
 _atom_site_fract_y 
 _atom_site_fract_z 
 _atom_site_U_iso_or_equiv 
 _atom_site_adp_type 
 _atom_site_occupancy 
 _atom_site_symmetry_multiplicity 
 _atom_site_calc_flag 
 _atom_site_refinement_flags 
 _atom_site_disorder_assembly 
 _atom_site_disorder_group 
C34 C 0.40989(4) 0.16575(4) 0.17085(12) 0.0354(3) Uani 1 1 d . . . 
C18 C 0.44528(4) 0.13587(4) 0.07963(13) 0.0386(3) Uani 1 1 d . . . 
H18 H 0.4483 0.1141 0.0671 0.046 Uiso 1 1 calc R . . 
C36 C 0.35338(4) 0.10913(4) 0.24194(12) 0.0353(3) Uani 1 1 d . . . 
C17 C 0.41414(4) 0.13266(4) 0.14760(12) 0.0360(3) Uani 1 1 d . . . 
C33 C 0.43597(4) 0.20165(4) 0.11828(13) 0.0381(3) Uani 1 1 d . . . 
H33 H 0.4329 0.2234 0.1302 0.046 Uiso 1 1 calc R . . 
C37 C 0.31495(4) 0.08008(4) 0.26986(13) 0.0376(3) Uani 1 1 d . . . 
H37 H 0.2971 0.0872 0.2991 0.045 Uiso 1 1 calc R . . 
C16 C 0.37931(4) 0.09760(4) 0.19254(12) 0.0362(3) Uani 1 1 d . . . 
C6 C 0.25410(4) 0.03491(4) 0.47338(13) 0.0395(3) Uani 1 1 d . . . 
C20 C 0.46697(4) 0.20498(4) 0.04721(13) 0.0381(3) Uani 1 1 d . . . 
C13 C 0.30310(5) 0.04023(4) 0.25404(13) 0.0411(4) Uani 1 1 d . . . 
C19 C 0.47168(4) 0.17214(4) 0.03093(13) 0.0389(3) Uani 1 1 d . . . 
H19 H 0.4930 0.1747 -0.0135 0.047 Uiso 1 1 calc R . . 
C38 C 0.36482(4) 0.17628(4) 0.31310(12) 0.0378(3) Uani 1 1 d . . . 
C21 C 0.49403(4) 0.24252(5) -0.01586(14) 0.0411(4) Uani 1 1 d . . . 
C15 C 0.36843(5) 0.05825(5) 0.18149(15) 0.0449(4) Uani 1 1 d . . . 
H15 H 0.3862 0.0510 0.1531 0.054 Uiso 1 1 calc R . . 
C43 C 0.31017(5) 0.17504(6) 0.43757(15) 0.0524(4) Uani 1 1 d . . . 
H43 H 0.2898 0.1592 0.4898 0.063 Uiso 1 1 calc R . . 
C35 C 0.37374(4) 0.15276(4) 0.24386(12) 0.0356(3) Uani 1 1 d . . . 
C7 C 0.23848(5) 0.00616(5) 0.37214(14) 0.0411(4) Uani 1 1 d . . . 
C14 C 0.33057(5) 0.02997(5) 0.21362(15) 0.0479(4) Uani 1 1 d . . . 
H14 H 0.3232 0.0035 0.2082 0.057 Uiso 1 1 calc R . . 
C5 C 0.23391(5) 0.05360(5) 0.51061(14) 0.0459(4) Uani 1 1 d . . . 
H5 H 0.2109 0.0486 0.4714 0.055 Uiso 1 1 calc R . . 
C40 C 0.38411(6) 0.24763(5) 0.34794(15) 0.0518(4) Uani 1 1 d . . . 
H40 H 0.4058 0.2730 0.3492 0.062 Uiso 1 1 calc R . . 
C22 C 0.49916(5) 0.24113(5) -0.13885(15) 0.0471(4) Uani 1 1 d . . . 
H22 H 0.4856 0.2171 -0.1784 0.057 Uiso 1 1 calc R . . 
C12 C 0.26128(5) 0.00844(4) 0.27168(14) 0.0421(4) Uani 1 1 d . . . 
C8 C 0.19975(5) -0.02457(5) 0.37873(16) 0.0538(4) Uani 1 1 d . . . 
H8 H 0.1846 -0.0263 0.4451 0.065 Uiso 1 1 calc R . . 
C44 C 0.33148(5) 0.15921(5) 0.39617(14) 0.0454(4) Uani 1 1 d . . . 
H44 H 0.3240 0.1341 0.4241 0.055 Uiso 1 1 calc R . . 
C39 C 0.39219(5) 0.21862(5) 0.32304(14) 0.0451(4) Uani 1 1 d . . . 
H39 H 0.4186 0.2267 0.3106 0.054 Uiso 1 1 calc R . . 
C23 C 0.52400(6) 0.27465(6) -0.20376(17) 0.0568(5) Uani 1 1 d . . . 
H23 H 0.5271 0.2729 -0.2857 0.068 Uiso 1 1 calc R . . 
C26 C 0.51427(5) 0.27914(5) 0.04298(16) 0.0477(4) Uani 1 1 d . . . 
C42 C 0.31440(6) 0.21282(6) 0.41253(15) 0.0558(5) Uani 1 1 d . . . 
H42 H 0.2924 0.2155 0.4254 0.067 Uiso 1 1 calc R . . 
C25 C 0.53871(6) 0.31249(5) -0.0254(2) 0.0614(5) Uani 1 1 d . . . 
H25 H 0.5519 0.3369 0.0121 0.074 Uiso 1 1 calc R . . 
C1 C 0.28831(5) 0.04307(6) 0.53386(15) 0.0519(4) Uani 1 1 d . . . 
H1 H 0.3022 0.0307 0.5104 0.062 Uiso 1 1 calc R . . 
C27 C 0.51088(6) 0.28356(5) 0.17420(17) 0.0539(4) Uani 1 1 d . . . 
C4 C 0.24763(6) 0.07972(6) 0.60560(16) 0.0560(5) Uani 1 1 d . . . 
H4 H 0.2336 0.0919 0.6302 0.067 Uiso 1 1 calc R . . 
C41 C 0.34687(7) 0.24467(6) 0.37257(16) 0.0564(5) Uani 1 1 d . . . 
H41 H 0.3451 0.2672 0.3594 0.068 Uiso 1 1 calc R . . 
C11 C 0.24355(6) -0.02019(5) 0.18240(16) 0.0539(4) Uani 1 1 d . . . 
H11 H 0.2582 -0.0188 0.1152 0.065 Uiso 1 1 calc R . . 
C9 C 0.18301(6) -0.05273(6) 0.28909(19) 0.0635(5) Uani 1 1 d . . . 
H9 H 0.1570 -0.0731 0.2956 0.076 Uiso 1 1 calc R . . 
C3 C 0.28177(6) 0.08784(6) 0.66411(16) 0.0603(5) Uani 1 1 d . . . 
H3 H 0.2911 0.1057 0.7273 0.072 Uiso 1 1 calc R . . 
C2 C 0.30199(6) 0.06922(7) 0.62807(16) 0.0617(5) Uani 1 1 d . . . 
H2 H 0.3250 0.0743 0.6676 0.074 Uiso 1 1 calc R . . 
C24 C 0.54390(6) 0.31027(6) -0.1471(2) 0.0643(5) Uani 1 1 d . . . 
H24 H 0.5608 0.3329 -0.1901 0.077 Uiso 1 1 calc R . . 
C10 C 0.20518(6) -0.05029(6) 0.19062(19) 0.0626(5) Uani 1 1 d . . . 
H10 H 0.1942 -0.0689 0.1298 0.075 Uiso 1 1 calc R . . 
C28 C 0.49992(7) 0.30996(6) 0.2174(2) 0.0662(5) Uani 1 1 d . . . 
H28 H 0.4945 0.3248 0.1636 0.079 Uiso 1 1 calc R . . 
C29 C 0.49694(9) 0.31460(8) 0.3391(2) 0.0860(8) Uani 1 1 d . . . 
H29 H 0.4897 0.3326 0.3664 0.103 Uiso 1 1 calc R . . 
C30 C 0.50450(11) 0.29295(9) 0.4193(2) 0.0985(9) Uani 1 1 d . . . 
H30 H 0.5021 0.2958 0.5010 0.118 Uiso 1 1 calc R . . 
C32 C 0.51861(8) 0.26186(7) 0.2564(2) 0.0726(6) Uani 1 1 d . . . 
H32 H 0.5258 0.2438 0.2298 0.087 Uiso 1 1 calc R . . 
C31 C 0.51565(11) 0.26683(9) 0.3784(2) 0.0983(9) Uani 1 1 d . . . 
H31 H 0.5213 0.2524 0.4329 0.118 Uiso 1 1 calc R . . 
 
loop_ 
 _atom_site_aniso_label 
 _atom_site_aniso_U_11 
 _atom_site_aniso_U_22 
 _atom_site_aniso_U_33 
 _atom_site_aniso_U_23 
 _atom_site_aniso_U_13 
 _atom_site_aniso_U_12 
C34 0.0376(7) 0.0375(7) 0.0329(7) -0.0035(5) -0.0024(5) 0.0202(6) 
C18 0.0414(8) 0.0378(7) 0.0418(8) -0.0017(6) 0.0004(6) 0.0236(6) 
C36 0.0416(8) 0.0375(7) 0.0294(7) -0.0010(5) -0.0003(5) 0.0217(6) 
C17 0.0390(7) 0.0376(7) 0.0337(7) -0.0013(5) -0.0018(5) 0.0209(6) 
C33 0.0403(8) 0.0354(7) 0.0410(8) -0.0028(6) 0.0003(6) 0.0206(6) 
C37 0.0425(8) 0.0389(8) 0.0333(7) -0.0007(5) 0.0042(5) 0.0218(6) 
C16 0.0402(8) 0.0380(8) 0.0330(7) 0.0006(5) 0.0006(5) 0.0215(6) 
C6 0.0406(8) 0.0423(8) 0.0343(7) 0.0038(6) 0.0048(6) 0.0197(7) 
C20 0.0378(7) 0.0376(8) 0.0384(7) -0.0014(6) -0.0011(6) 0.0186(6) 
C13 0.0464(8) 0.0383(8) 0.0376(7) 0.0004(6) 0.0063(6) 0.0204(7) 
C19 0.0373(7) 0.0420(8) 0.0404(8) -0.0008(6) 0.0031(6) 0.0220(6) 
C38 0.0431(8) 0.0402(8) 0.0331(7) -0.0033(5) -0.0029(6) 0.0231(6) 
C21 0.0386(8) 0.0386(8) 0.0509(9) 0.0028(6) 0.0040(6) 0.0228(7) 
C15 0.0511(9) 0.0406(8) 0.0501(9) 0.0020(6) 0.0098(7) 0.0283(7) 
C43 0.0525(10) 0.0607(10) 0.0433(9) -0.0107(7) 0.0039(7) 0.0278(8) 
C35 0.0382(7) 0.0376(7) 0.0323(7) -0.0008(5) -0.0004(5) 0.0200(6) 
C7 0.0434(8) 0.0405(8) 0.0403(8) 0.0012(6) 0.0031(6) 0.0217(7) 
C14 0.0558(10) 0.0345(8) 0.0548(9) 0.0023(6) 0.0118(7) 0.0237(7) 
C5 0.0462(9) 0.0512(9) 0.0438(8) -0.0020(7) -0.0006(6) 0.0271(7) 
C40 0.0695(11) 0.0406(9) 0.0447(9) -0.0047(7) 0.0021(7) 0.0270(8) 
C22 0.0533(9) 0.0443(9) 0.0503(9) 0.0035(7) 0.0090(7) 0.0293(8) 
C12 0.0474(9) 0.0354(7) 0.0427(8) -0.0002(6) 0.0053(6) 0.0201(7) 
C8 0.0465(9) 0.0513(9) 0.0530(9) -0.0016(7) 0.0092(7) 0.0165(8) 
C44 0.0511(9) 0.0422(8) 0.0409(8) -0.0050(6) 0.0043(6) 0.0217(7) 
C39 0.0507(9) 0.0420(8) 0.0412(8) -0.0054(6) 0.0034(6) 0.0221(7) 
C23 0.0694(12) 0.0571(10) 0.0569(10) 0.0158(8) 0.0203(8) 0.0413(10) 
C26 0.0458(9) 0.0390(8) 0.0582(10) 0.0000(7) 0.0006(7) 0.0212(7) 
C42 0.0633(11) 0.0774(13) 0.0463(9) -0.0146(8) -0.0089(8) 0.0498(11) 
C25 0.0599(11) 0.0364(9) 0.0820(13) 0.0036(8) 0.0066(10) 0.0197(8) 
C1 0.0497(9) 0.0714(12) 0.0424(9) 0.0019(8) 0.0008(7) 0.0361(9) 
C27 0.0542(10) 0.0404(9) 0.0588(10) -0.0073(7) -0.0066(8) 0.0173(7) 
C4 0.0684(12) 0.0566(10) 0.0486(9) -0.0065(8) 0.0039(8) 0.0354(9) 
C41 0.0846(14) 0.0615(11) 0.0444(9) -0.0073(8) -0.0077(8) 0.0524(11) 
C11 0.0589(11) 0.0439(9) 0.0507(9) -0.0075(7) 0.0096(7) 0.0197(8) 
C9 0.0495(10) 0.0474(10) 0.0719(12) -0.0075(9) 0.0066(9) 0.0081(8) 
C3 0.0698(12) 0.0603(11) 0.0392(9) -0.0070(7) -0.0043(8) 0.0237(10) 
C2 0.0530(10) 0.0805(13) 0.0436(9) -0.0012(9) -0.0101(8) 0.0273(10) 
C24 0.0668(12) 0.0477(10) 0.0798(14) 0.0215(9) 0.0234(10) 0.0297(9) 
C10 0.0639(12) 0.0466(10) 0.0625(12) -0.0166(8) 0.0004(9) 0.0164(9) 
C28 0.0796(14) 0.0515(11) 0.0659(12) -0.0094(9) -0.0022(10) 0.0317(10) 
C29 0.1058(19) 0.0719(15) 0.0781(16) -0.0270(12) -0.0025(13) 0.0428(14) 
C30 0.137(3) 0.0895(19) 0.0604(14) -0.0235(13) -0.0124(14) 0.0498(19) 
C32 0.0913(16) 0.0661(13) 0.0656(13) -0.0112(10) -0.0194(11) 0.0432(12) 
C31 0.141(3) 0.0921(19) 0.0639(15) -0.0098(12) -0.0292(15) 0.0600(19) 
 
_geom_special_details 
; 
 All esds (except the esd in the dihedral angle between two l.s. planes) 
 are estimated using the full covariance matrix.  The cell esds are taken 
 into account individually in the estimation of esds in distances, angles 
 and torsion angles; correlations between esds in cell parameters are only 
 used when they are defined by crystal symmetry.  An approximate (isotropic) 
 treatment of cell esds is used for estimating esds involving l.s. planes. 
; 
 
loop_ 
 _geom_bond_atom_site_label_1 
 _geom_bond_atom_site_label_2 
 _geom_bond_distance 
 _geom_bond_site_symmetry_2 
 _geom_bond_publ_flag 
C34 C33 1.388(2) . ? 
C34 C17 1.410(2) . ? 
C34 C35 1.486(2) . ? 
C18 C19 1.383(2) . ? 
C18 C17 1.387(2) . ? 
C18 H18 0.9300 . ? 
C36 C37 1.394(2) . ? 
C36 C16 1.413(2) . ? 
C36 C35 1.481(2) . ? 
C17 C16 1.458(2) . ? 
C33 C20 1.401(2) . ? 
C33 H33 0.9300 . ? 
C37 C13 1.399(2) . ? 
C37 H37 0.9300 . ? 
C16 C15 1.384(2) . ? 
C6 C5 1.383(2) . ? 
C6 C1 1.387(2) . ? 
C6 C7 1.494(2) . ? 
C20 C19 1.399(2) . ? 
C20 C21 1.490(2) . ? 
C13 C14 1.398(2) . ? 
C13 C12 1.494(2) . ? 
C19 H19 0.9300 . ? 
C38 C35 1.375(2) . ? 
C38 C39 1.460(2) . ? 
C38 C44 1.463(2) . ? 
C21 C22 1.393(2) . ? 
C21 C26 1.407(2) . ? 
C15 C14 1.382(2) . ? 
C15 H15 0.9300 . ? 
C43 C44 1.346(2) . ? 
C43 C42 1.432(3) . ? 
C43 H43 0.9300 . ? 
C7 C8 1.389(2) . ? 
C7 C12 1.408(2) . ? 
C14 H14 0.9300 . ? 
C5 C4 1.382(2) . ? 
C5 H5 0.9300 . ? 
C40 C39 1.352(2) . ? 
C40 C41 1.431(3) . ? 
C40 H40 0.9300 . ? 
C22 C23 1.384(3) . ? 
C22 H22 0.9300 . ? 
C12 C11 1.398(2) . ? 
C8 C9 1.387(3) . ? 
C8 H8 0.9300 . ? 
C44 H44 0.9300 . ? 
C39 H39 0.9300 . ? 
C23 C24 1.366(3) . ? 
C23 H23 0.9300 . ? 
C26 C25 1.398(3) . ? 
C26 C27 1.489(3) . ? 
C42 C41 1.336(3) . ? 
C42 H42 0.9300 . ? 
C25 C24 1.384(3) . ? 
C25 H25 0.9300 . ? 
C1 C2 1.376(3) . ? 
C1 H1 0.9300 . ? 
C27 C32 1.383(3) . ? 
C27 C28 1.389(3) . ? 
C4 C3 1.374(3) . ? 
C4 H4 0.9300 . ? 
C41 H41 0.9300 . ? 
C11 C10 1.373(3) . ? 
C11 H11 0.9300 . ? 
C9 C10 1.374(3) . ? 
C9 H9 0.9300 . ? 
C3 C2 1.377(3) . ? 
C3 H3 0.9300 . ? 
C2 H2 0.9300 . ? 
C24 H24 0.9300 . ? 
C10 H10 0.9300 . ? 
C28 C29 1.384(4) . ? 
C28 H28 0.9300 . ? 
C29 C30 1.363(4) . ? 
C29 H29 0.9300 . ? 
C30 C31 1.375(5) . ? 
C30 H30 0.9300 . ? 
C32 C31 1.389(4) . ? 
C32 H32 0.9300 . ? 
C31 H31 0.9300 . ? 
 
loop_ 
 _geom_angle_atom_site_label_1 
 _geom_angle_atom_site_label_2 
 _geom_angle_atom_site_label_3 
 _geom_angle 
 _geom_angle_site_symmetry_1 
 _geom_angle_site_symmetry_3 
 _geom_angle_publ_flag 
C33 C34 C17 119.15(13) . . ? 
C33 C34 C35 132.16(13) . . ? 
C17 C34 C35 108.45(12) . . ? 
C19 C18 C17 118.68(14) . . ? 
C19 C18 H18 120.7 . . ? 
C17 C18 H18 120.7 . . ? 
C37 C36 C16 118.78(13) . . ? 
C37 C36 C35 132.59(13) . . ? 
C16 C36 C35 108.41(13) . . ? 
C18 C17 C34 121.31(14) . . ? 
C18 C17 C16 129.76(13) . . ? 
C34 C17 C16 108.49(13) . . ? 
C34 C33 C20 119.90(13) . . ? 
C34 C33 H33 120.1 . . ? 
C20 C33 H33 120.1 . . ? 
C36 C37 C13 120.16(13) . . ? 
C36 C37 H37 119.9 . . ? 
C13 C37 H37 119.9 . . ? 
C15 C16 C36 121.34(14) . . ? 
C15 C16 C17 129.82(14) . . ? 
C36 C16 C17 108.47(12) . . ? 
C5 C6 C1 118.25(15) . . ? 
C5 C6 C7 119.96(14) . . ? 
C1 C6 C7 121.77(15) . . ? 
C19 C20 C33 119.62(14) . . ? 
C19 C20 C21 119.31(13) . . ? 
C33 C20 C21 121.01(13) . . ? 
C14 C13 C37 119.18(14) . . ? 
C14 C13 C12 118.90(14) . . ? 
C37 C13 C12 121.80(14) . . ? 
C18 C19 C20 121.21(14) . . ? 
C18 C19 H19 119.4 . . ? 
C20 C19 H19 119.4 . . ? 
C35 C38 C39 121.04(14) . . ? 
C35 C38 C44 121.20(14) . . ? 
C39 C38 C44 116.82(13) . . ? 
C22 C21 C26 118.78(15) . . ? 
C22 C21 C20 118.21(14) . . ? 
C26 C21 C20 123.01(15) . . ? 
C14 C15 C16 118.60(14) . . ? 
C14 C15 H15 120.7 . . ? 
C16 C15 H15 120.7 . . ? 
C44 C43 C42 129.10(17) . . ? 
C44 C43 H43 115.4 . . ? 
C42 C43 H43 115.4 . . ? 
C38 C35 C36 127.64(13) . . ? 
C38 C35 C34 126.65(13) . . ? 
C36 C35 C34 104.96(12) . . ? 
C8 C7 C12 118.70(15) . . ? 
C8 C7 C6 118.10(14) . . ? 
C12 C7 C6 123.19(14) . . ? 
C15 C14 C13 121.64(14) . . ? 
C15 C14 H14 119.2 . . ? 
C13 C14 H14 119.2 . . ? 
C4 C5 C6 120.57(16) . . ? 
C4 C5 H5 119.7 . . ? 
C6 C5 H5 119.7 . . ? 
C39 C40 C41 128.95(17) . . ? 
C39 C40 H40 115.5 . . ? 
C41 C40 H40 115.5 . . ? 
C23 C22 C21 121.72(17) . . ? 
C23 C22 H22 119.1 . . ? 
C21 C22 H22 119.1 . . ? 
C11 C12 C7 118.19(15) . . ? 
C11 C12 C13 118.17(14) . . ? 
C7 C12 C13 123.63(14) . . ? 
C9 C8 C7 121.86(17) . . ? 
C9 C8 H8 119.1 . . ? 
C7 C8 H8 119.1 . . ? 
C43 C44 C38 128.66(16) . . ? 
C43 C44 H44 115.7 . . ? 
C38 C44 H44 115.7 . . ? 
C40 C39 C38 128.51(16) . . ? 
C40 C39 H39 115.7 . . ? 
C38 C39 H39 115.7 . . ? 
C24 C23 C22 119.82(18) . . ? 
C24 C23 H23 120.1 . . ? 
C22 C23 H23 120.1 . . ? 
C25 C26 C21 118.07(17) . . ? 
C25 C26 C27 119.21(16) . . ? 
C21 C26 C27 122.71(15) . . ? 
C41 C42 C43 126.47(17) . . ? 
C41 C42 H42 116.8 . . ? 
C43 C42 H42 116.8 . . ? 
C24 C25 C26 122.11(18) . . ? 
C24 C25 H25 118.9 . . ? 
C26 C25 H25 118.9 . . ? 
C2 C1 C6 121.03(17) . . ? 
C2 C1 H1 119.5 . . ? 
C6 C1 H1 119.5 . . ? 
C32 C27 C28 118.07(19) . . ? 
C32 C27 C26 121.47(18) . . ? 
C28 C27 C26 120.47(18) . . ? 
C3 C4 C5 120.63(18) . . ? 
C3 C4 H4 119.7 . . ? 
C5 C4 H4 119.7 . . ? 
C42 C41 C40 126.55(17) . . ? 
C42 C41 H41 116.7 . . ? 
C40 C41 H41 116.7 . . ? 
C10 C11 C12 122.16(16) . . ? 
C10 C11 H11 118.9 . . ? 
C12 C11 H11 118.9 . . ? 
C10 C9 C8 119.40(17) . . ? 
C10 C9 H9 120.3 . . ? 
C8 C9 H9 120.3 . . ? 
C4 C3 C2 119.23(17) . . ? 
C4 C3 H3 120.4 . . ? 
C2 C3 H3 120.4 . . ? 
C1 C2 C3 120.29(17) . . ? 
C1 C2 H2 119.9 . . ? 
C3 C2 H2 119.9 . . ? 
C23 C24 C25 119.48(17) . . ? 
C23 C24 H24 120.3 . . ? 
C25 C24 H24 120.3 . . ? 
C11 C10 C9 119.70(17) . . ? 
C11 C10 H10 120.2 . . ? 
C9 C10 H10 120.2 . . ? 
C29 C28 C27 121.1(2) . . ? 
C29 C28 H28 119.4 . . ? 
C27 C28 H28 119.4 . . ? 
C30 C29 C28 120.3(2) . . ? 
C30 C29 H29 119.9 . . ? 
C28 C29 H29 119.9 . . ? 
C29 C30 C31 119.5(2) . . ? 
C29 C30 H30 120.2 . . ? 
C31 C30 H30 120.2 . . ? 
C27 C32 C31 120.4(2) . . ? 
C27 C32 H32 119.8 . . ? 
C31 C32 H32 119.8 . . ? 
C30 C31 C32 120.6(3) . . ? 
C30 C31 H31 119.7 . . ? 
C32 C31 H31 119.7 . . ? 
 
_diffrn_measured_fraction_theta_max    0.987 
_diffrn_reflns_theta_full              66.89 
_diffrn_measured_fraction_theta_full   0.987 
_refine_diff_density_max    0.956 
_refine_diff_density_min   -0.180 
_refine_diff_density_rms    0.101 
